# Supplementary material for: An enzyme-centric approach for modelling non-linear biological complexity
Source: PubMed Central journal article supplement (PMC3146071; doi:10.1186/1752-0509-2-70), 2008-08-01
Supplement: 1752-0509-2-70-S2.pdf [file 1752-0509-2-70-S2.pdf]

# Yang, Additional File 1

## A. Curve fitting for the allosteric parameters of threonine deaminase in *Salmonella typhimurium*.

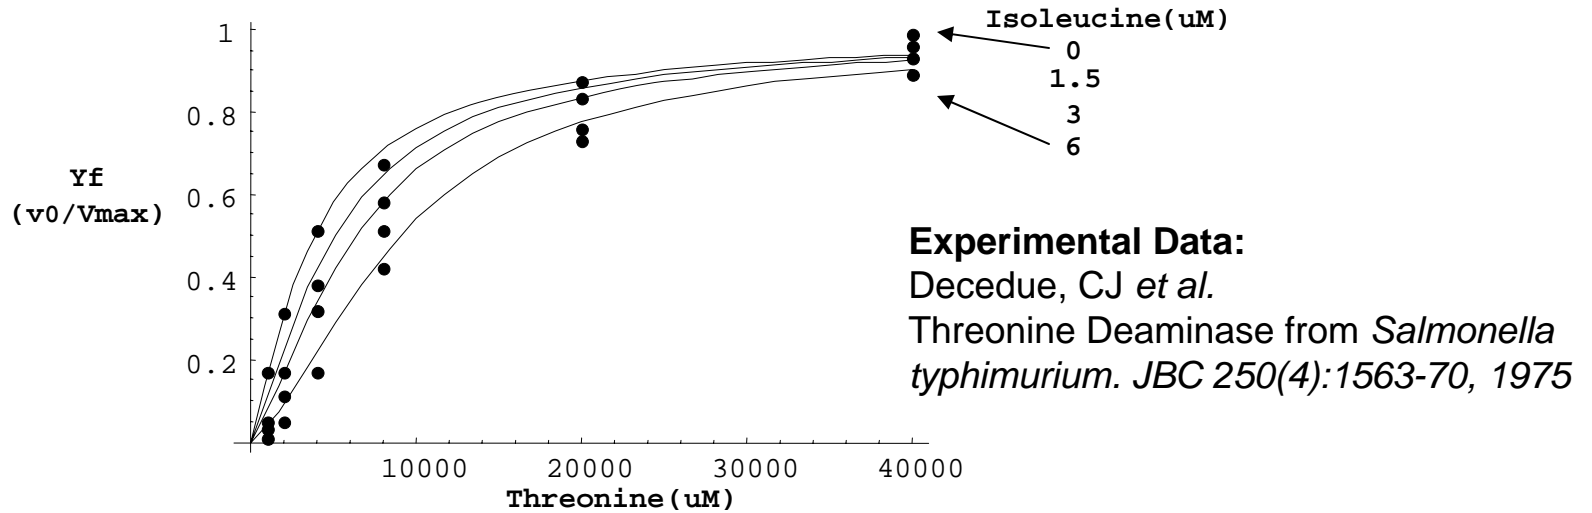

## B. Toxic Accumulation of $\alpha$ -Ketobutyrate Caused by Inhibition of the Branched-Chain Amino Acid Biosynthetic Enzyme Acetolactate Synthase in *Salmonella typhimurium*.

LaRossa *et al.* DuPont Co. Inc. *J. Bact.* 169: 1372-1378 (1987)

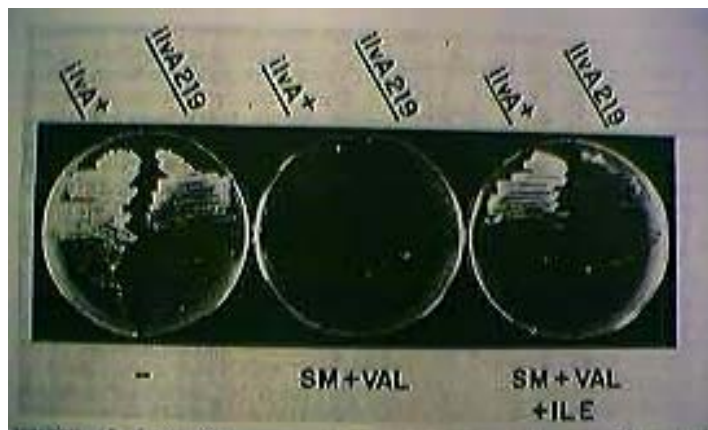

ilvA+: wild-type

ilvA219: threonine deaminase mutant,  
resistant to isoleucine feedback inhibition

↑  
Isoleucine Rescue of Sulfometuron Methyl and Valine Growth Inhibition
