# Supplementary material for: An enzyme-centric approach for modelling non-linear biological complexity
Source: PubMed Central journal article supplement (PMC3146071; doi:10.1186/1752-0509-2-70), 2008-08-01
Supplement: 1752-0509-2-70-S3.pdf [file 1752-0509-2-70-S3.pdf]

## Yang, Additional File 3: $\Lambda$ Approximation and Langevin Equation

A.  $\Lambda$  Approximation (Yang et al. *Bioinformatics* 2005, 21(6):774-780) :

While increasing the values of  $\Lambda$ , reaction curves converge to the *Michaelis-Menten* equation

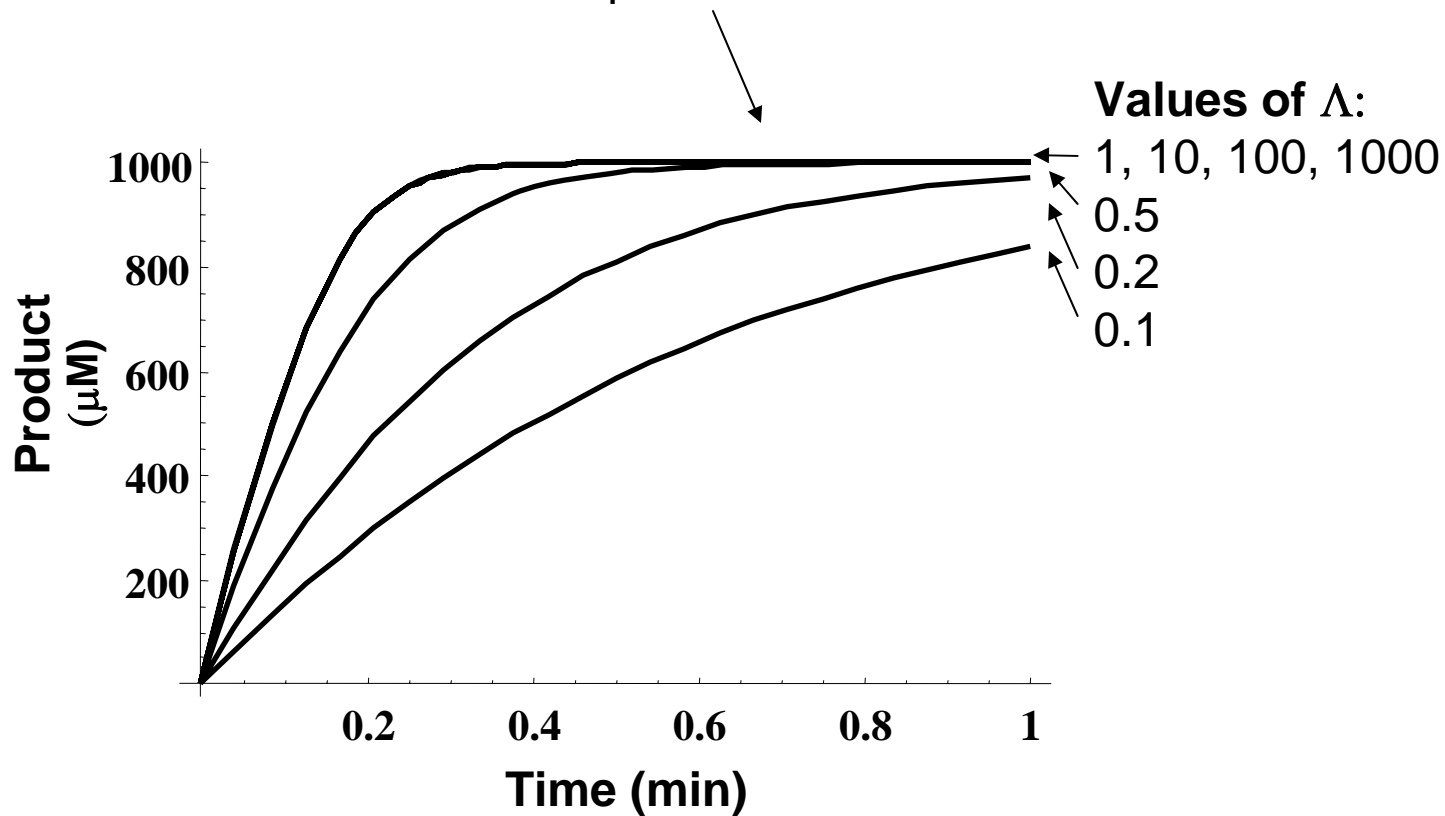

**B. Langevin Equation:** the probabilistic perturbations of transcription and splicing rates to simulate the experimental variations shown in Figure 4D.

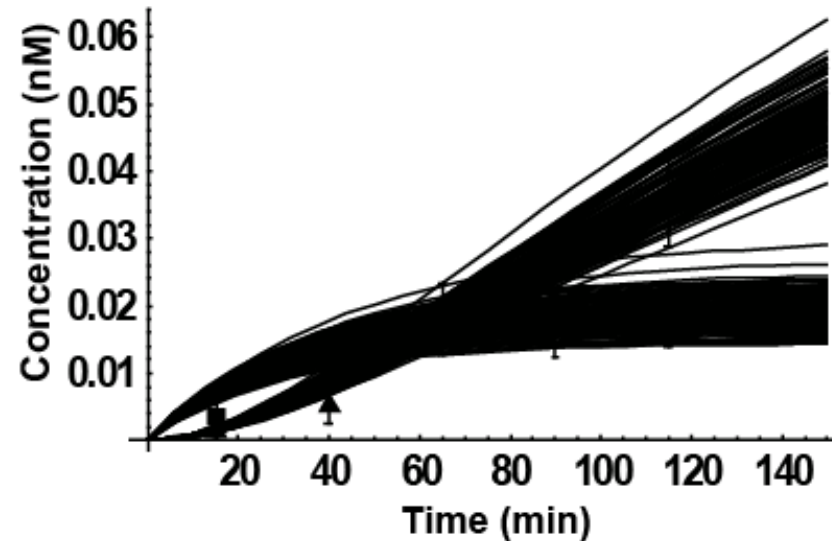

Notes:

1. Each line represents one stochastic simulation over time.
2. The overlapping lines represent the range of variations corresponding to the experimental error bars in Figure 4D.
